# Supplementary material
Source: publisher figshare collection journal article supplement (https://acs.figshare.com/ndownloader/files/4595047)
Supplement: Supplementary file 1 [file 4595047]

## **Supporting Information**

### **Hole-doping to aligned single-walled carbon nanotubes from sapphire substrate induced by heat treatment**

Hiroki Ago,\* Izumi Tanaka, Masaharu Tsuji, Ken-ichi Ikeda, and Seigi Mizuno

*Institute for Materials Chemistry and Engineering, Graduate School of Engineering Sciences,*

*Graduate School of Engineering, Kyushu University, Japan*

*PRESTO-JST, Japan*

## 1. Other excitation wavelength (633 nm)

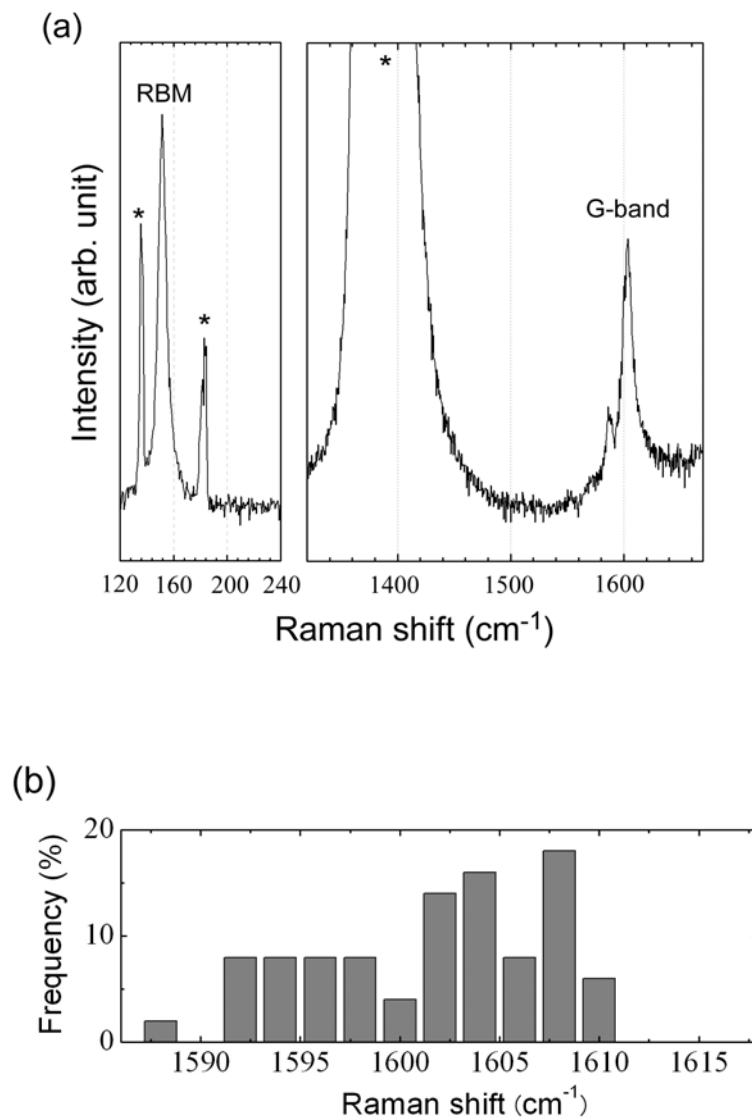

**Figure S-1.** (a) Raman spectrum of the SWNT/sapphire sample heat treated at 1000 °C. The excitation wavelength was 633 nm, and semiconducting nanotubes were detected. The sample is same with that shown in Fig. 3c. (b) Distribution of G-band frequency measured with an excitation wavelength of 633 nm. Total number of counted nanotubes is 50.

## 2. Additional Raman mapping images

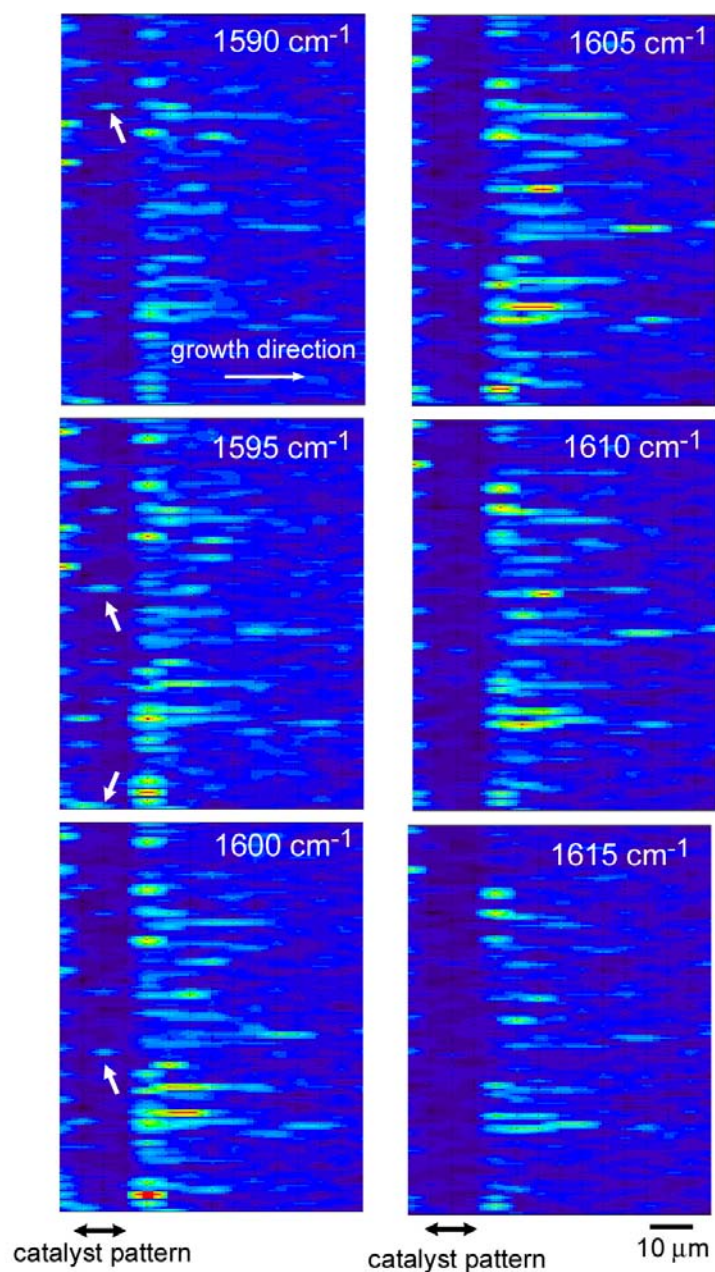

**Figure S-2.** Raman G-band mapping images of the SWNTs heat treated at 1000 °C. Inside the catalyst pattern, no significant shift in the G-band was observed (indicated by arrows). The excitation wavelength was 514.5 nm. The scan intervals were 5 and 1 μm for *x* and *y* directions, respectively.

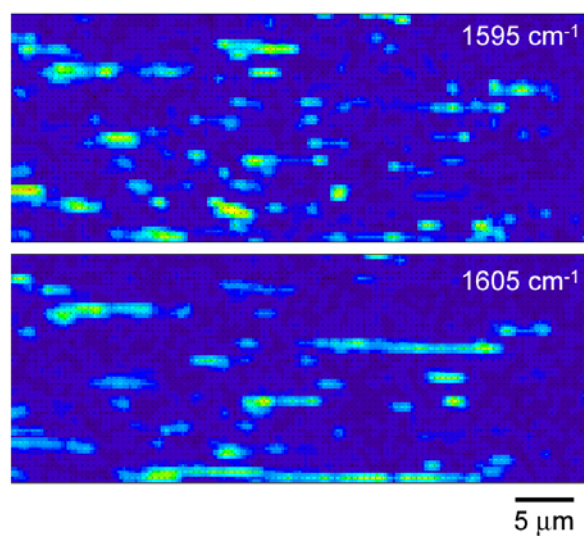

**Figure S-3.** Raman mapping images of the SWNTs grown over randomly deposited Fe-Mo catalyst, measured after the heat treatment at 1000 °C. The nanotubes were relatively short and showed wide G-band frequencies randomly distributed. The scan intervals were 0.5  $\mu\text{m}$  for both  $x$  and  $y$  directions.

### 3. Original Auger spectra

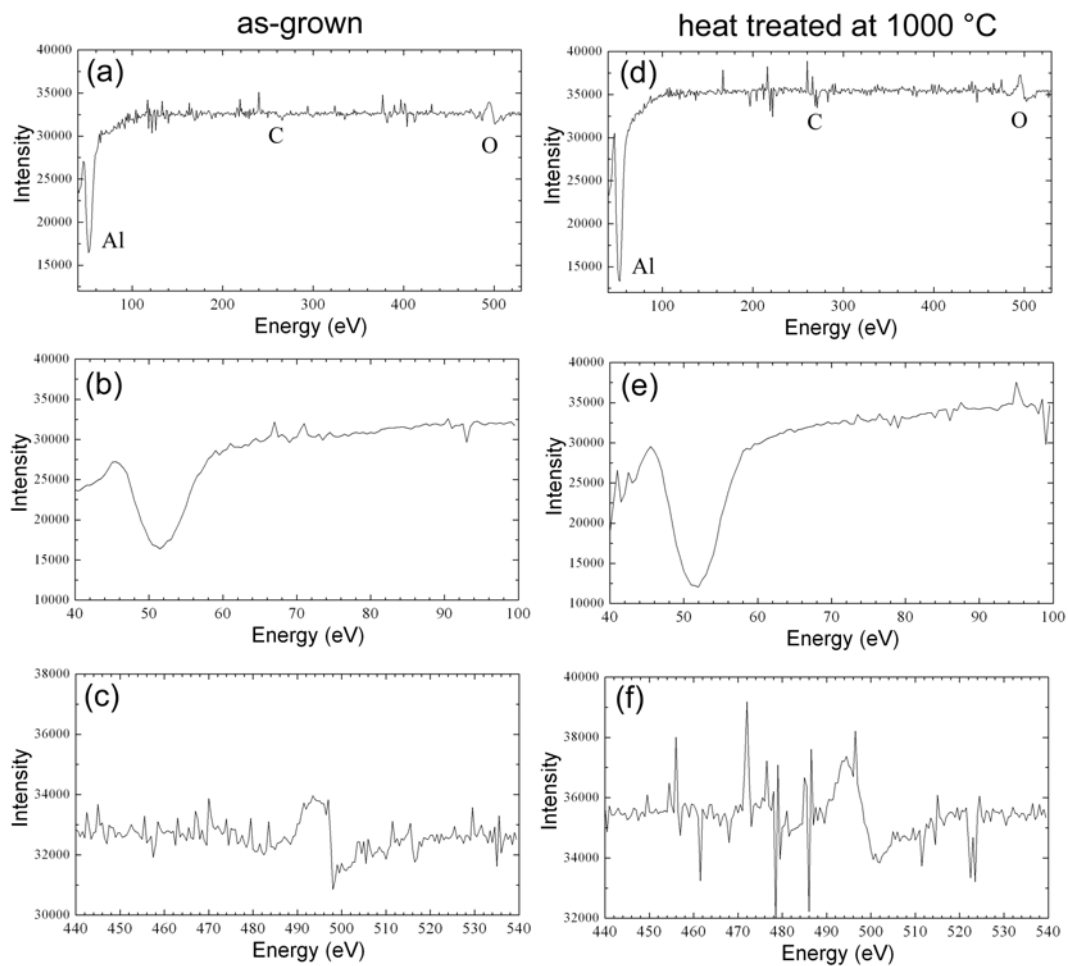

**Figure S-4.** Auger spectra of as-grown SWNTs (a-c) and those after the heat treatment at 1000 °C (d-f). (a, d) full range, (b, e) Al, (c, f) O. It is seen that relative intensity of [Al]/[O] increased after the heat treatment.

#### 4. Atomic model

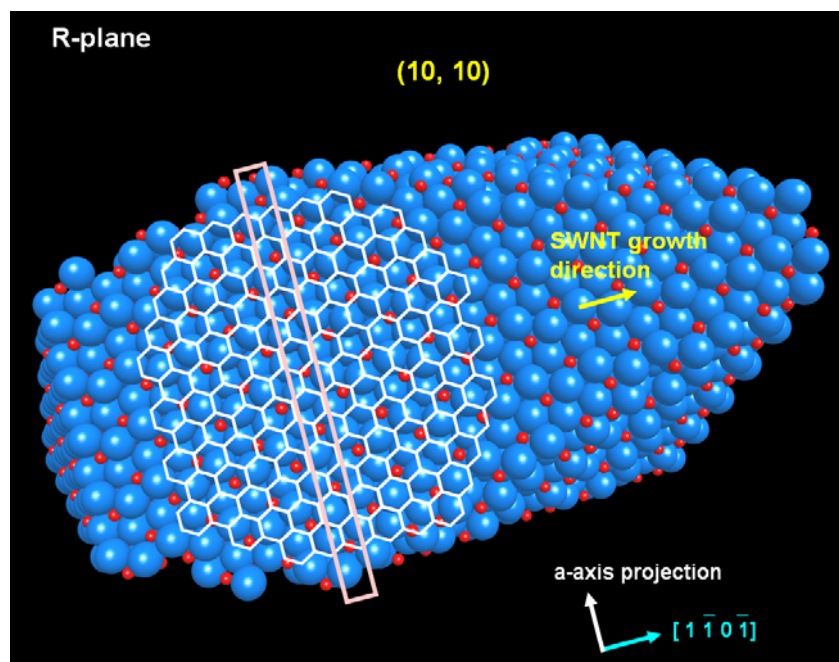

**Figure S-5.** Atomic model of *r*-plane sapphire surface overlapped with a developed (10, 10) SWNT structure. Red and blue show Al and O atoms, respectively. Although (10, 10) nanotube is metallic, we use it as a model nanotube here because of its simple structure.
